# Supplementary material
Source: publisher site journal article supplement (https://www.degruyterbrill.com/publication/isbn/9783110452228/downloadAsset/9783110452228_Gramsch_Kap13.pdf)
Supplement: Supplementary file 1 [file 9783110452228_Gramsch_Kap13.pdf]

Gramsch-Stehfest, S. 197:

**Quellen zum Studium des Johannes Eschbach von Frankfurt** (Digitalisate der deutschen Universitätsmatrikeln):

Inskriptionen in Erfurter und Heidelberger Matrikel im WS 1442 bzw. WS 1449 (Matrikel Erfurt, Bd. 1, S. 192 und Matrikel Heidelberg, Bd. 1, S. 262)

- **Links:** <https://archive.org/details/actendererfurte00hortgoog/page/n229> (S. 192, rechte Spalte, Zeile 33) und <https://digi.ub.uni-heidelberg.de/diglit/matrikel1386/0340/image>.

Promotionen in Heidelberg 1451 bzw. 1454 (Matrikel Heidelberg, Bd. 2, S. 514 und 530)

- **Links:** <https://digi.ub.uni-heidelberg.de/diglit/matrikel1554/0518/image> und <https://digi.ub.uni-heidelberg.de/diglit/matrikel1554/0534/image>

# RG online

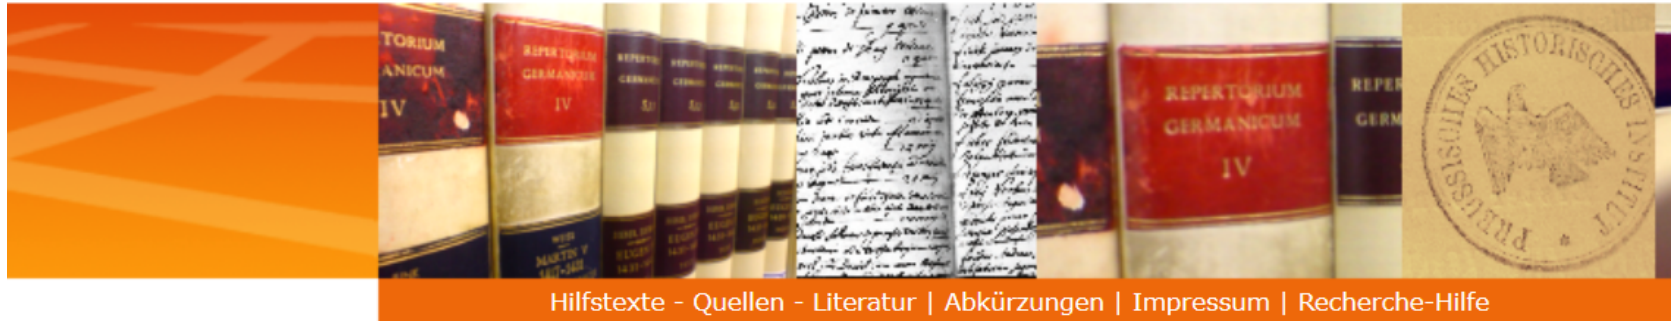

Hilfstexte - Quellen - Literatur | Abkürzungen | Impressum | Recherche-Hilfe

Suche

Merkliste

Indizes

Personen (RG 5-9)

Orte (RG 5-9)

Recherchebäume

+ Daten

+ Fundstellen

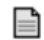

RG VIII 02801

zur Merkliste hinzufügen

Johannes de Eschbach licent. in decr. , cler. Magunt. motu pr. supplic. Johanne com. de Nassauw germano Adolphi aep. de gr. expect. de 2 can. sub expect. preb. s. Petri et s. Victoris e. m. Magunt. eccl. <c. prerog. fam. descript. et perinde val. acsi s. d. 24. nov. 58 conc.> 27. aug. 1463 S 567 85vs., V 510 294v-296v.

27. aug. 1463

qui in suo licent. receptatione in stud. Heydelbergen. iuravit quod n. alibi quam ibidem insignia recip. vellet: supplic. Johanne com. de Nassauw germano Adolphi aep. de disp. sup. iuram. 27. aug. 1463 S 567 86r.

27. aug. 1463

supplic. d. Johanne de lic. elig. confess. 27. aug. 1463 S 567 86r.

27. aug. 1463

Gramsch-Stehfest, S. 199:

**Vita des Johannes Eschbach von Frankfurt** im Repertorium Germanicum, Bd. 8, Nr. 2801 (Online-Version).

**Quelle:** online aufsuchbar über <http://194.242.233.132/dengRG/index.htm> (Suche nach Datum = „14630827“, 11. Treffer, abgerufen am: 12.12.2018)

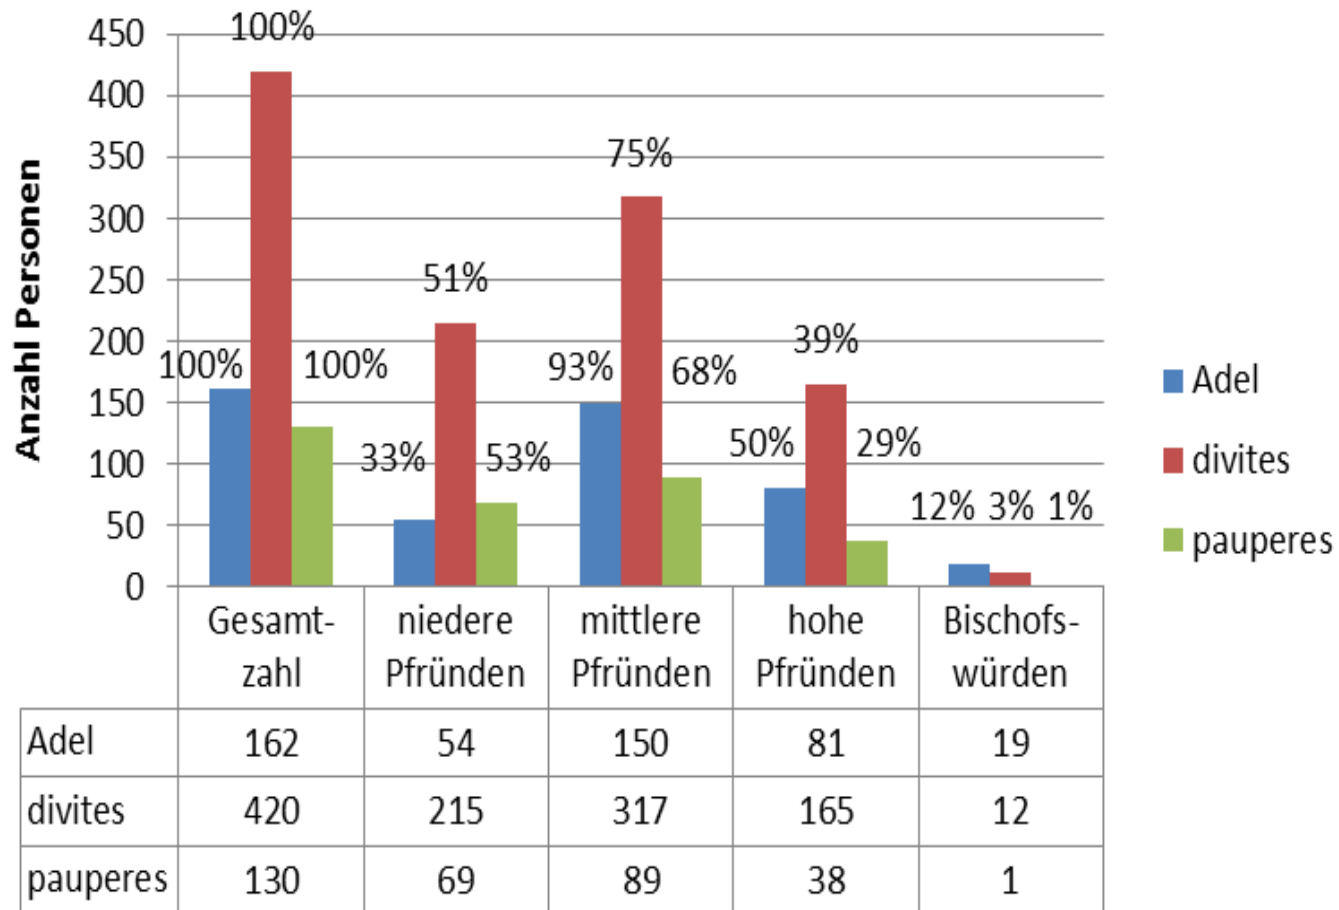

Gramsch-Stehfest, S. 203 (= Abb. 11):

**Erfolgsquoten der Erfurter Juristen beim Erwerb von Pfründen**, differenziert nach geburtsständisch-ökonomischen universitären Statusgruppen: 1. Adel, 2. *divites* (Reiche) und 3. *pauperes* (Arme). Die Zahlenwerte unten geben die absolute Anzahl von Personen der entsprechenden Kategorie an, die Prozentwerte im Diagramm beziffern die Anteile der Inhaber einer Pfründenkategorie in Relation zur Gesamtzahl der Mitglieder der Statusgruppe (so sind z.B. 75 % der *divites* im Besitz mittlerer Pfründen nachgewiesen).

**Quelle:** Graphik nach Robert Gramsch, Erfurter Juristen im Spätmittelalter. Die Karrieremuster und Tätigkeitsfelder einer gelehrten Elite des 14. und 15. Jahrhunderts (Education and Society in the Middle Ages and Renaissance, 17), Leiden / Boston 2003, Tab. 11, S. 293-295.

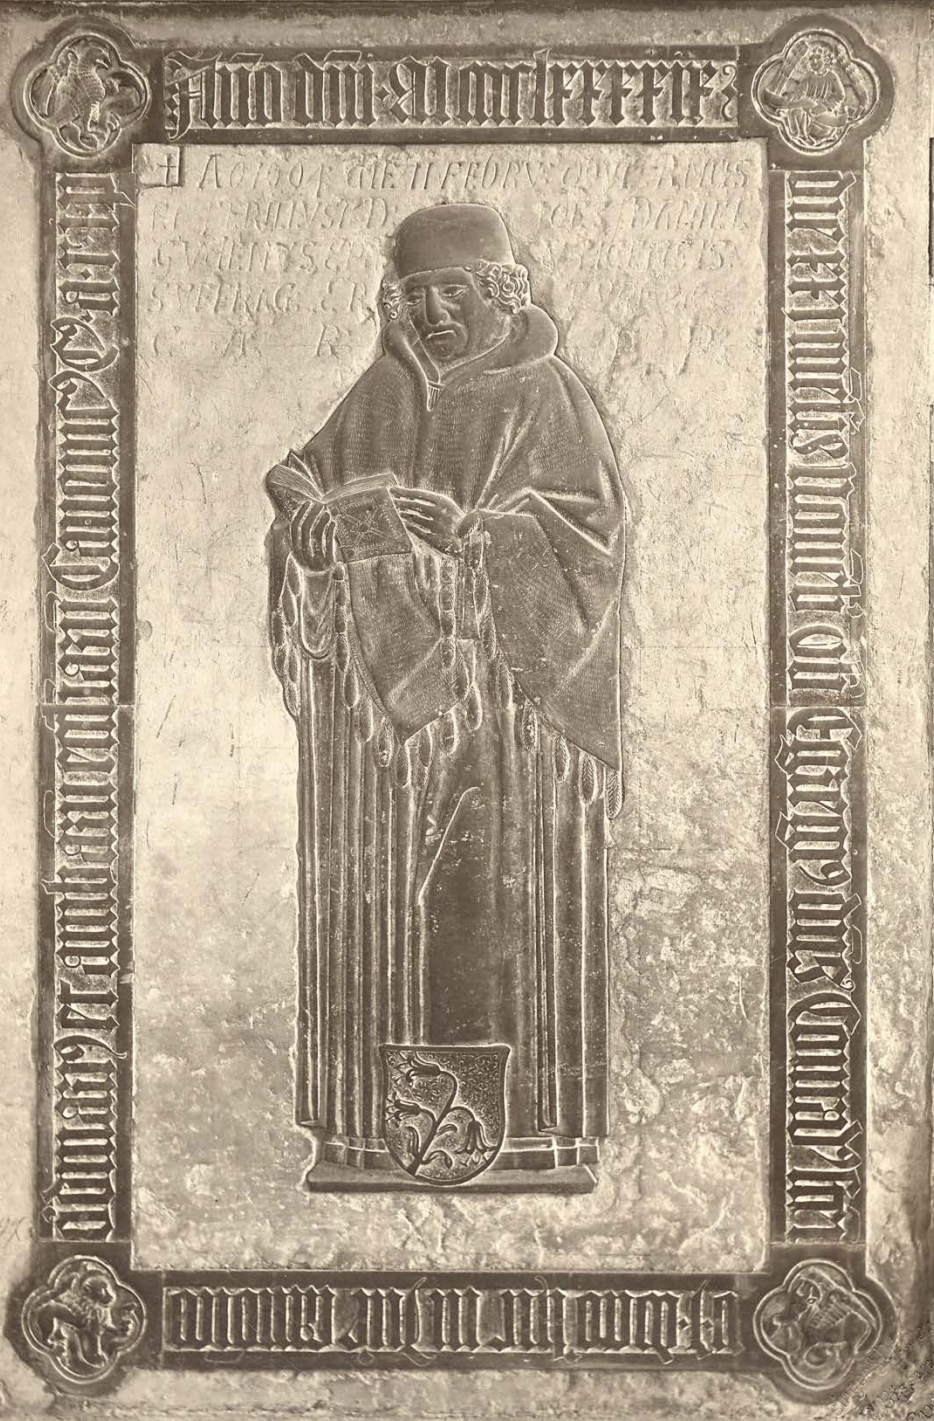

Gramsch-Stehfest, S. 205:

**Grabplatte des Konrad Stein von Jena** (†1499), *utriusque iuris doctor*, Rechtsprofessor und Generalrichter sowie Kanoniker in St. Marien zu Erfurt.

**Quelle:** Foto nach dem Original im Dom St. Marien Erfurt.

Gramsch-Stehfest, S. 206:

Beispiel für einen **Frühdruck (Inkunabel)**: Albrecht von Eyb, Ehebüchlein (Nürnberg: Anton Koberger, 1472), erste Seite mit Inhaltsverzeichnis.

**Link:** <http://daten.digitalen-sammlungen.de/0003/bsb00034298/images/index.html?id=00034298&groesser=&fip=xsxseayaxsxswfsdreayaxxs&no=5&seite=5>
